# Supplementary material for: Isotherm model for moisture-controlled CO2 sorption
Source: Royal Society of Chemistry journal article supplement (doi:10.1039/d2cp01131j), 2022-01-01
Supplement: d2cp01131j1.pdf [file d2cp01131j1.pdf]

Supplementary Information  
for  
Isotherm Model for Moisture-Controlled CO<sub>2</sub>  
Sorptions

Yuta Kaneko and Klaus S. Lackner  
School of Sustainable Engineering & the Built Environment  
Arizona State University

# 1 Derivation of the approximate isotherm equation for negligible $[\text{CO}_2]$ and $[\text{H}^+]$ ( $S_{\text{III}}$ )

When  $[\text{H}^+]$  is negligible,  $[\text{OH}^-]$  can be explicitly expressed as a function of  $[\text{CO}_2]$  by solving the following quadratic equation:

$$2K_1K_2[\text{CO}_2][\text{OH}^-]^2 + (1 + K_1[\text{CO}_2])[\text{OH}^-] - [\text{A}] = 0 \quad (\text{S.1})$$

Namely,

$$[\text{OH}^-] = \frac{-(1 + K_1[\text{CO}_2]) + \sqrt{(1 + K_1[\text{CO}_2])^2 + 8K_1K_2[\text{CO}_2][\text{A}]}}{4K_1K_2[\text{CO}_2]} \quad (\text{S.2})$$

We can express  $\theta$  using this explicit form of  $[\text{OH}^-]$ . Since  $K_1$  always appears with  $[\text{CO}_2]$ , we define  $\zeta$  for convenience as:

$$\zeta \equiv K_1[\text{CO}_2] \quad (\text{S.3})$$

Then,

$$[\text{OH}^-] + K_2[\text{OH}^-]^2 = \frac{-(1 + \zeta) + \sqrt{(1 + \zeta)^2 + 8\zeta K_2[\text{A}]}}{4\zeta K_2} + K_2 \left\{ \frac{-(1 + \zeta) + \sqrt{(1 + \zeta)^2 + 8\zeta K_2[\text{A}]}}{4\zeta K_2} \right\}^2 \quad (\text{S.4})$$

$$= (\zeta - 1) \frac{\sqrt{(1 + \zeta)^2 + 8\zeta K_2[\text{A}]} - (1 + \zeta)}{8\zeta^2 K_2} + \frac{[\text{A}]}{2\zeta} \quad (\text{S.5})$$

So,

$$[\text{DIC}] \sim \zeta ([\text{OH}^-] + K_2[\text{OH}^-]^2) \quad (\text{S.6})$$

$$= (\zeta - 1) \frac{\sqrt{(1 + \zeta)^2 + 8\zeta K_2[\text{A}]} - (1 + \zeta)}{8\zeta K_2} + \frac{[\text{A}]}{2} \quad (\text{S.7})$$

Therefore,

$$\theta = [\text{DIC}]/[\text{A}] \quad (\text{S.8})$$

$$\sim (\zeta - 1) \frac{\sqrt{(1 + \zeta)^2 + 8\zeta K_2[\text{A}]} - (1 + \zeta)}{8\zeta K_2[\text{A}]} + \frac{1}{2} \quad (\text{S.9})$$

$$= (K_1[\text{CO}_2] - 1) \frac{\sqrt{(1 + K_1[\text{CO}_2])^2 + 8K_1[\text{CO}_2]K_2[\text{A}]} - (1 + K_1[\text{CO}_2])}{8K_1[\text{CO}_2]K_2[\text{A}]} + \frac{1}{2} \quad (\text{S.10})$$

Substituting  $[\text{CO}_2] = K_H P_{\text{CO}_2}$  into this equation yields

$$\theta \sim (K_H K_1 P_{\text{CO}_2} - 1) \frac{\sqrt{(1 + K_H K_1 P_{\text{CO}_2})^2 + 8K_H K_1 K_2 P_{\text{CO}_2}[\text{A}]} - (1 + K_H K_1 P_{\text{CO}_2})}{8K_H K_1 K_2 P_{\text{CO}_2}[\text{A}]} + \frac{1}{2} \quad (\text{S.11})$$

$$\equiv S_{\text{III}}(P_{\text{CO}_2}) \quad (\text{S.12})$$

## 2 Derivation of the approximate isotherm equation for negligible $[\text{CO}_2]$ , $[\text{H}^+]$ and $[\text{OH}^-]$ ( $S_{\text{IV}}$ )

If  $\zeta = K_H K_1 P_{\text{CO}_2} (= [\text{HCO}_3^-]/[\text{OH}^-]) \gg 1$  is satisfied (negligible  $[\text{OH}^-]$  approximation), Eq.(S.9) can be rewritten as:

$$\theta \sim (\zeta - 1) \frac{\sqrt{(1 + \zeta)^2 + 8\zeta K_2[A]} - (1 + \zeta)}{8\zeta K_2[A]} + \frac{1}{2} \quad (\text{S.13})$$

$$= (\zeta^2 - 1) \frac{\sqrt{1 + \frac{8\zeta K_2[A]}{(\zeta+1)^2}} - 1}{8\zeta K_2[A]} + \frac{1}{2} \quad (\text{S.14})$$

$$= \zeta \left(1 - \frac{1}{\zeta^2}\right) \frac{\sqrt{1 + \frac{8K_2[A]}{\zeta + \{2 + (1/\zeta)\}}} - 1}{8K_2[A]} + \frac{1}{2} \quad (\text{S.15})$$

$$\sim \zeta \frac{\sqrt{1 + \frac{8K_2[A]}{\zeta}} - 1}{8K_2[A]} + \frac{1}{2} \quad (\because \zeta \gg 1) \quad (\text{S.16})$$

$$= \frac{\zeta}{8K_2[A]} \left( \sqrt{1 + \frac{8K_2[A]}{\zeta}} - 1 \right) + \frac{1}{2} \quad (\text{S.17})$$

$$= \frac{K_{\text{eq}} P_{\text{CO}_2}}{4} \left( \sqrt{1 + \frac{4}{K_{\text{eq}} P_{\text{CO}_2}}} - 1 \right) + \frac{1}{2} \quad (\text{S.18})$$

$$\equiv S_{\text{IV}}(P_{\text{CO}_2}) \quad (\text{S.19})$$

where,

$$K_{\text{eq}} \equiv \frac{K_1 K_H}{2K_2[A]} \quad (\text{S.20})$$

### 3 Derivation of the Langmuir approximation of the isotherm ( $S_V$ )

If we assume  $\frac{4}{K_{\text{eq}}P_{\text{CO}_2}} \ll 1$ , then a Taylor expansion of Eq.(S.18) up to the 2nd-order term yields:

$$\theta - \frac{1}{2} \sim \frac{K_{\text{eq}}P_{\text{CO}_2}}{4} \left( \sqrt{1 + \frac{4}{K_{\text{eq}}P_{\text{CO}_2}}} - 1 \right) \quad (\text{S.21})$$

$$= \frac{\cancel{K_{\text{eq}}P_{\text{CO}_2}}}{4} \left\{ \left( \cancel{\lambda} + \frac{1}{2} \left( \frac{\cancel{4}}{K_{\text{eq}}P_{\text{CO}_2}} \right) - \frac{1}{8} \left( \frac{\cancel{4}}{K_{\text{eq}}P_{\text{CO}_2}} \right)^{\frac{3}{2}} + \dots \right) - \cancel{\lambda} \right\} \quad (\text{S.22})$$

$$\sim \frac{1}{2} \cdot \left( 1 - \frac{1}{K_{\text{eq}}P_{\text{CO}_2}} \right) \quad (\text{S.23})$$

$$\sim \frac{1}{2} \cdot \frac{1}{1 + \frac{1}{K_{\text{eq}}P_{\text{CO}_2}}} \quad (\because \frac{1}{K_{\text{eq}}P_{\text{CO}_2}} \ll 1) \quad (\text{S.24})$$

$$= \frac{1}{2} \cdot \frac{K_{\text{eq}}P_{\text{CO}_2}}{1 + K_{\text{eq}}P_{\text{CO}_2}} \quad (\text{S.25})$$

Namely,

$$\theta \sim \frac{1}{2} \cdot \left( \frac{K_{\text{eq}}P_{\text{CO}_2}}{1 + K_{\text{eq}}P_{\text{CO}_2}} \right) + \frac{1}{2} \quad (\text{S.26})$$

$$\equiv S_V(P_{\text{CO}_2}) \quad (\text{S.27})$$
